# Supplementary material for: Survival Benefits of Radiotherapy and Surgery in Lung Cancer Brain Metastases with Poor Prognosis Factors
Source: Curr Oncol. 2023 Feb 13;30(2):2227–36. doi: 10.3390/curroncol30020172 (PMC9954973; doi:10.3390/curroncol30020172)
Supplement: Supplementary file 1 [file curroncol-30-00172-s001.zip › curroncol-2116433-supplementary.pdf]

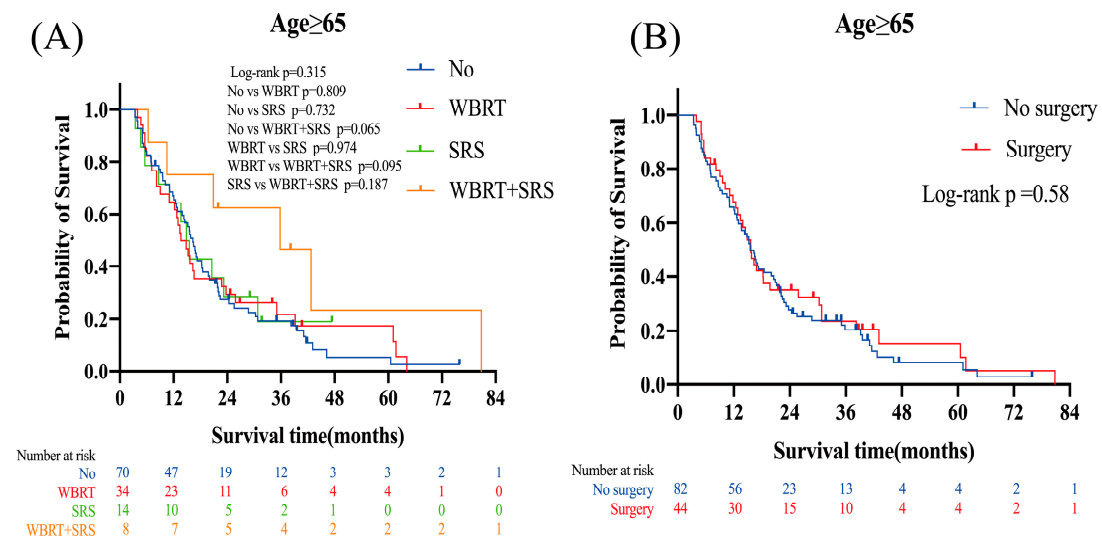

**Figure S1.** Kaplan–Meier overall survival (OS) curves of patients with lung cancer brain metastases with age  $\geq 65$  years. **(A)** Kaplan–Meier OS according to radiotherapy. **(B)** Kaplan–Meier OS according to surgery.

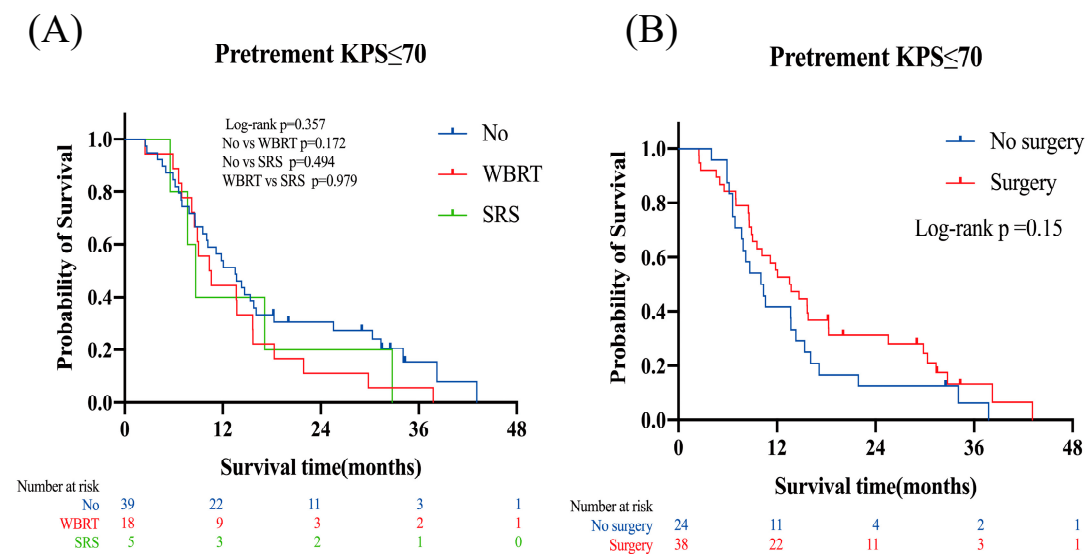

**Figure S2.** Kaplan–Meier overall survival (OS) curves of patients with lung cancer brain metastases with pretreatment KPS  $\leq 70$ . **(A)** Kaplan–Meier OS according to radiotherapy. **(B)** Kaplan–Meier OS curves according to surgery.

Age $\geq$ 65

(A)

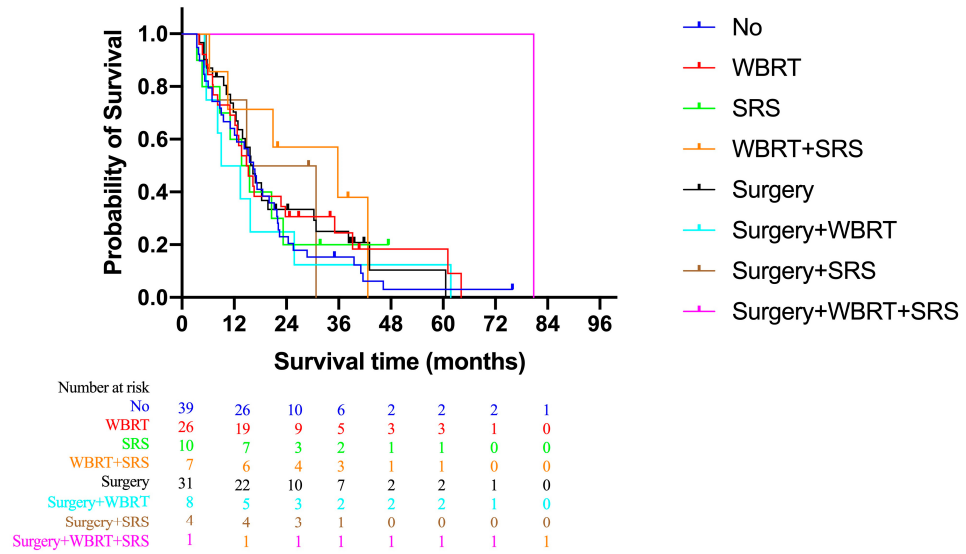

Pretreatment KPS $\leq$ 70

(B)

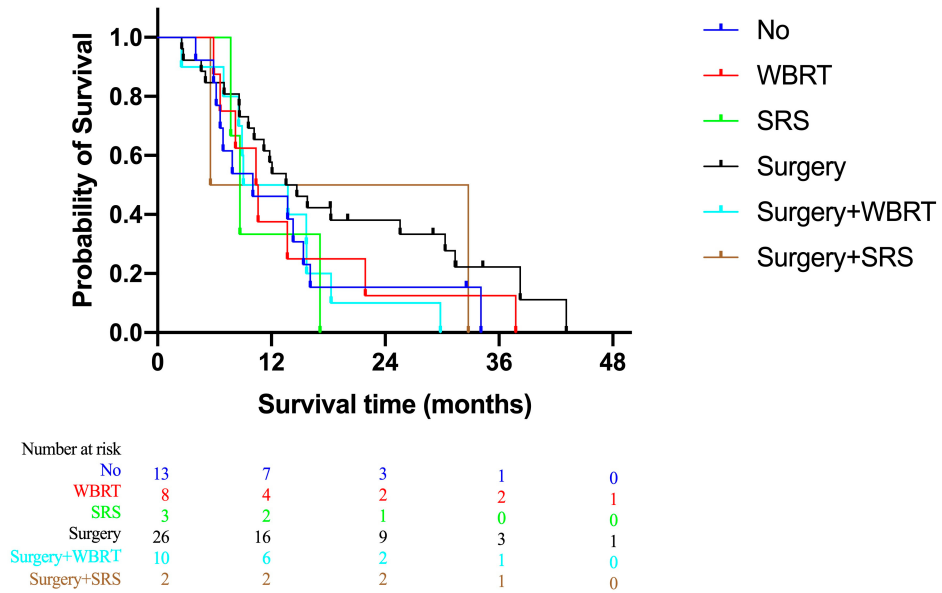

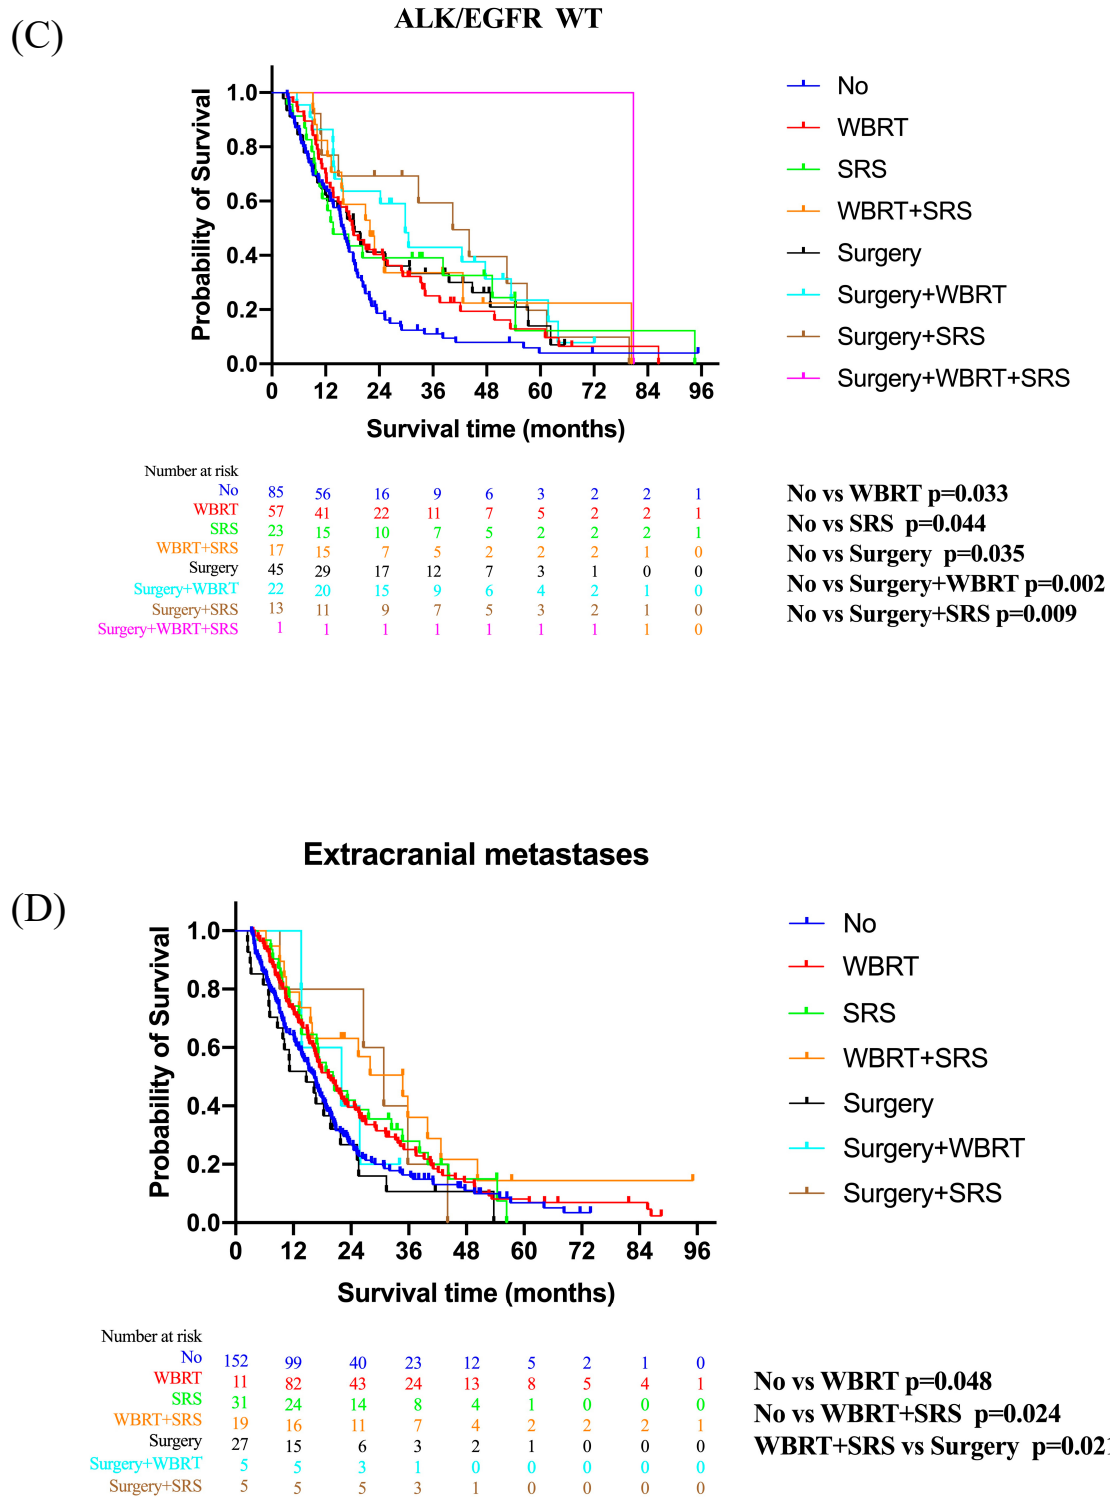

**Figure S3.** Kaplan–Meier overall survival (OS) curves of patients with lung cancer brain metastases of all subgroups and all treatment groups.
